# Supplementary material for: The Scaphoid Safe Zone: A Radiographic Simulation Study to Prevent Cortical Perforation Arising from Different Views
Source: PLoS One. 2017 Jan 23;12(1):e0170677. doi: 10.1371/journal.pone.0170677 (PMC5256911; doi:10.1371/journal.pone.0170677)
Supplement: S3 Text — (XLSX) [file pone.0170677.s006.xlsx]

## Sheet: RD1
K-wires	Screw
0.0853	0.0521
0.0839	0.0583
0.0451	0.0863
0.1157	0.0485
0.0612	0.0672
0.0608	0.0512
0.1075	0.0763
0.1067	0.0652
0.1062	0.0432
0.0713	0.0338
0.1107	0.0583
0.1277	0.033
0.1203	0.0615
0.0731	0.0372
0.0388	0.0375
0.0316	0.0446
0.0679	0.0635
0.0821	0.0575
0.0912	0.0524
0.0747	0.0532
0.082	0.0661
0.1119	0.0815
0.0873	0.0583
0.0975	0.0613
0.0739	0.0462
0.0812	0.0533
0.0836	0.0572
0.0674	0.0327
0.0762	0.0414
0.0787	0.0487

## Sheet: UD2
K-wires	Screw
0.1171	0.1472
0.1494	0.132
0.1807	0.1156
0.1759	0.0921
0.1189	0.0877
0.1493	0.0932
0.1283	0.1138
0.137	0.1092
0.1782	0.1709
0.0845	0.0898
0.1652	0.0901
0.1515	0.1162
0.1595	0.1293
0.2209	0.1171
0.2376	0.1201
0.1693	0.1507
0.2129	0.1622
0.1281	0.1101
0.2375	0.1434
0.1371	0.1107
0.1276	0.0893
0.1588	0.0926
0.1417	0.1004
0.1436	0.1131
0.1155	0.0907
0.2172	0.1474
0.1713	0.1269
0.1698	0.1112
0.1596	0.1201
0.1212	0.0837

## Sheet: RV3
K-wires	Screw
0.04	0.0091
0.0413	0.0082
0.0149	0.0117
0.0353	0.0081
0.0332	0.0074
0.0474	0.0062
0.0317	0.0081
0.0312	0.0063
0.0105	0.0108
0.0622	0.0107
0.0511	0.0079
0.0289	0.0082
0.0196	0.0074
0.0266	0.0083
0.0157	0.0052
0.0117	0.0077
0.0165	0.0097
0.0365	0.0078
0.0321	0.0099
0.0428	0.0118
0.0227	0.0079
0.0376	0.0095
0.0314	0.0077
0.0391	0.0069
0.0414	0.0113
0.0227	0.0086
0.0382	0.0077
0.0269	0.0082
0.0197	0.0076
0.0329	0.0065

## Sheet: UV4
K-wires	Screw
0.0095	0.0042
0.0148	0.0021
0.0346	0.0037
0.0147	0.0096
0.0384	0.0024
0.0289	0.0009
0.0421	0.0011
0.0161	0.0037
0.0281	0.0056
0.0395	0.0077
0.0357	0.0045
0.0208	0.0038
0.0449	0.0042
0.0321	0.0055
0.0481	0.0063
0.0367	0.0062
0.0215	0.0057
0.0187	0.0054
0.0301	0.0034
0.0214	0.0027
0.0404	0.0016
0.0328	0.0028
0.0271	0.0024
0.0379	0.0017
0.0283	0.0024
0.0226	0.0052
0.0377	0.0061
0.0212	0.0043
0.0245	0.0021
0.0304	0.0014
